# Supplementary material for: Asymmetric Dinuclear Lanthanide(III) Complexes from the Use of a Ligand Derived from 2-Acetylpyridine and Picolinoylhydrazide: Synthetic, Structural and Magnetic Studies
Source: PubMed Central journal article supplement (PMC7397153; doi:10.3390/molecules25143153), 2020-07-10
Supplement: molecules-25-03153-s001.pdf [file molecules-25-03153-s001.pdf]

Supplementary Materials

# Asymmetric Dinuclear Lanthanide(III) Complexes from the Use of a Ligand Derived from 2-Acetylpyridine and Picolinoylhydrazide: Synthetic, Structural and Magnetic Studies<sup>†</sup>

Diamantoula Maniaki <sup>1</sup>, Panagiota S. Perlepe <sup>2,3</sup>, Evangelos Pilichos <sup>1</sup>, Sotirios Christodoulou <sup>4</sup>, Mathieu Rouzières <sup>2</sup>, Pierre Dechambenoit <sup>2,\*</sup>, Rodolphe Clérac <sup>2,\*</sup> and Spyros P. Perlepes <sup>1,5,\*</sup>

<sup>1</sup> Department of Chemistry, University of Patras, 265 04 Patras, Greece; [dia.maniaki@gmail.com](mailto:dia.maniaki@gmail.com) (D.M.); [pilvag@gmail.com](mailto:pilvag@gmail.com) (E.P.)

<sup>2</sup> Univ. Bordeaux, CNRS, Centre de Recherche Paul Pascal, UMR 5031, 336 00, Pessac, France; [panagiota.perlepe@crpp.cnrs.fr](mailto:panagiota.perlepe@crpp.cnrs.fr) (P.S.P.); [mathieu.rouzieres@crpp.cnrs.fr](mailto:mathieu.rouzieres@crpp.cnrs.fr) (M.R.)

<sup>3</sup> Univ. Bordeaux, CNRS, ICMCB, UMR 5026, 336 00, Pessac, France

<sup>4</sup> ICFO-Institut de Ciències Fotoniques, The Barcelona Institute of Nanoscience and Nanotechnology, Castelldefels, 088 60 Barcelona, Spain; [Sotirios.Christodoulou@alumni.icfo.eu](mailto:Sotirios.Christodoulou@alumni.icfo.eu) (S.C.)

<sup>5</sup> Foundation for Research and Technology-Hellas (FORTH), Institute of Chemical Engineering Sciences (ICE-HT), Platani, P.O. Box 1414, 265 04 Patras, Greece

\* Correspondence: [pierre.dechambenoit@crpp.cnrs.fr](mailto:pierre.dechambenoit@crpp.cnrs.fr) (P.D.); [rodolphe.clerac@crpp.cnrs.fr](mailto:rodolphe.clerac@crpp.cnrs.fr) (R.C.); [perlepes@patreas.upatras.gr](mailto:perlepes@patreas.upatras.gr) (S.P.P.); Tel: +33-556845671 (P.D.); +33-556845650 (R.C.); +30-2610-996730 (S.P.P.)

<sup>†</sup> This article is dedicated to the memory of Professor Kyriakos Riganakos, an excellent academician, a great food chemistry scientist and a precious friend.

Received: 25 May 2020; Accepted: 5 July 2020; Published: date

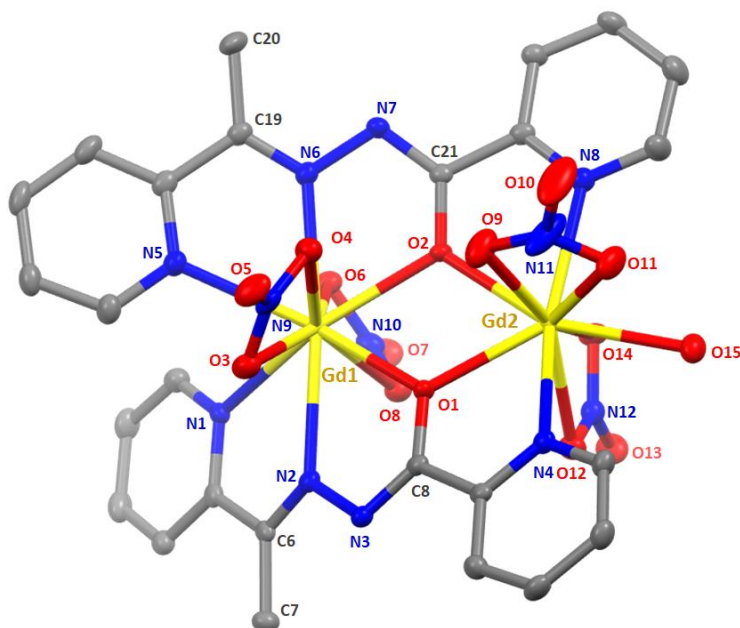

**Figure S1.** Crystal structure of  $[\text{Gd}_2(\text{NO}_3)_4(\text{L})_2(\text{H}_2\text{O})]$  as found in  $1\cdot 2\text{MeOH}\cdot 2\text{H}_2\text{O}$  at 120 K. Thermal ellipsoids are depicted at 50% probability level. Hydrogen atoms and solvent molecules are omitted for clarity.

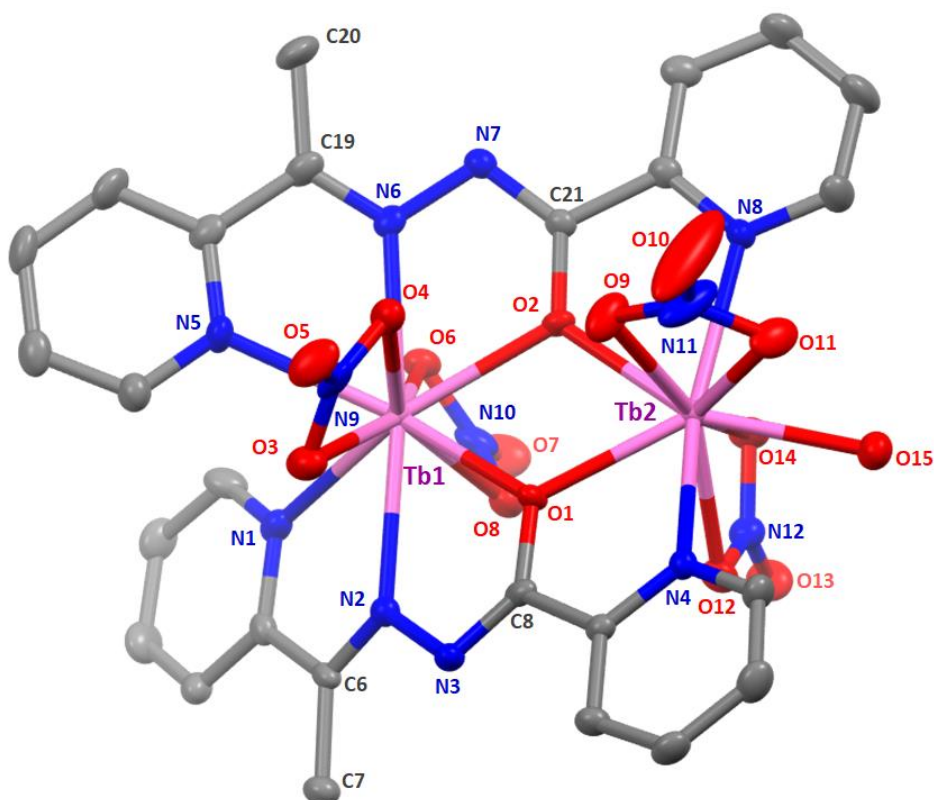

**Figure S2.** The molecule  $[\text{Tb}_2(\text{NO}_3)_4(\text{L})_2(\text{H}_2\text{O})]$  that is present in the crystal structure of  $2\cdot 2\text{MeOH}\cdot 1.5\text{H}_2\text{O}$ . Thermal ellipsoids are depicted at 50% probability level. Hydrogen atoms are omitted for clarity.

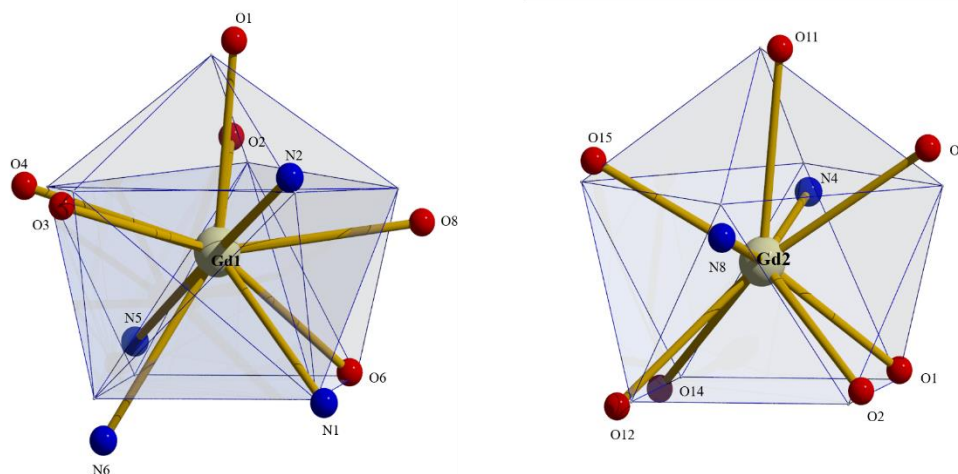

**Figure S3.** Spenocoronated and spherical capped square antiprismatic coordination geometries of Gd1 and Gd2, respectively, in the structure of 1·2MeOH·2H<sub>2</sub>O. The plotted polyhedra represent the ideal, best-fit polyhedra using the program SHAPE.

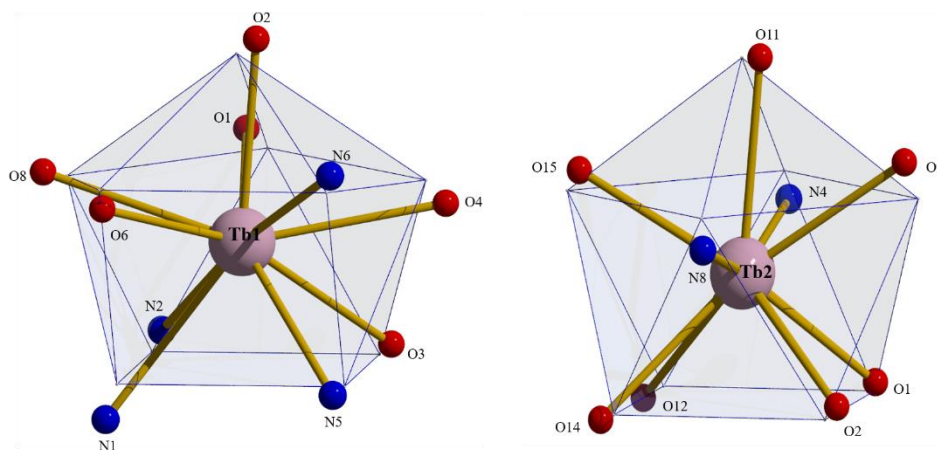

**Figure S4.** Spenocoronated and spherical capped square antiprismatic coordination geometries of Tb1 and Tb2, respectively, in the structure of 2·2MeOH·1.5H<sub>2</sub>O. The plotted polyhedra represent the ideal, best-fit polyhedra using the program SHAPE.

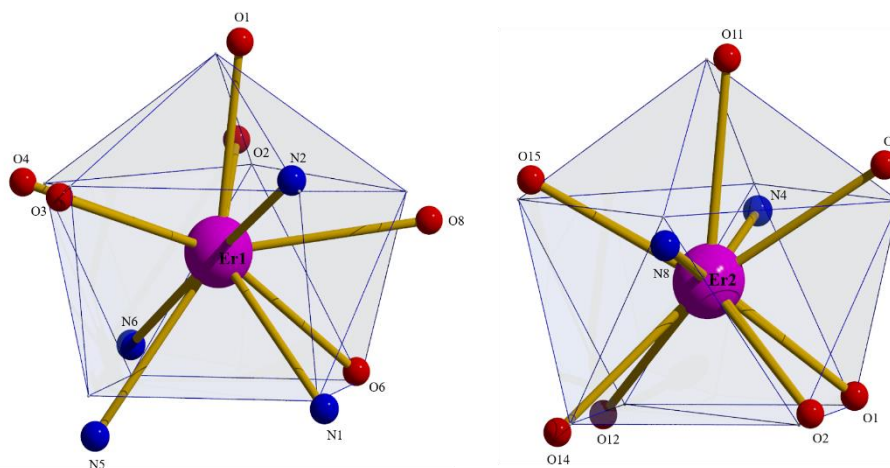

**Figure S5.** Spenocoronated and spherical capped square antiprismatic coordination geometries of Er1 and Er2, respectively, in the structure of 4·3MeOH·0.5H<sub>2</sub>O. The plotted polyhedra represent the ideal, best-fit polyhedra using the program SHAPE.

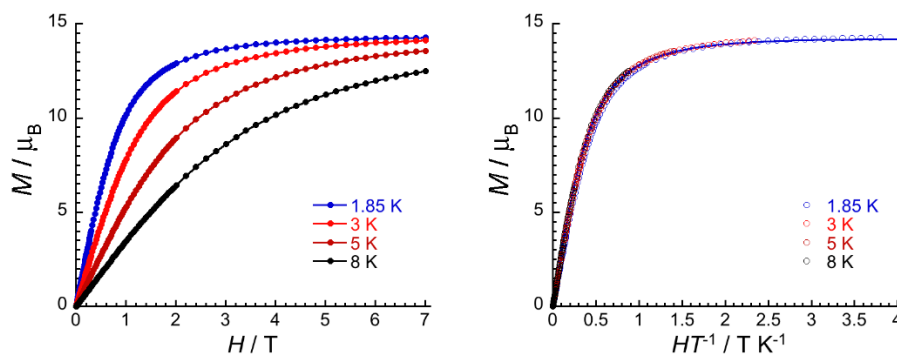

**Figure S6.** (Left) Field dependence of magnetization for 1:2MeOH:2H<sub>2</sub>O at the temperatures indicated, scanning at 100 – 400 Oe·min<sup>-1</sup> for  $H < 1$  T and 500 – 2500 Oe·min<sup>-1</sup> for  $H > 1$  T. Solid lines are visual guides. (Right) Field dependence of reduced magnetization at the temperatures indicated. Solid line represents the best fit of the  $M$  vs.  $H/T$  data to the sum of two  $S = 7/2$  Brillouin functions.

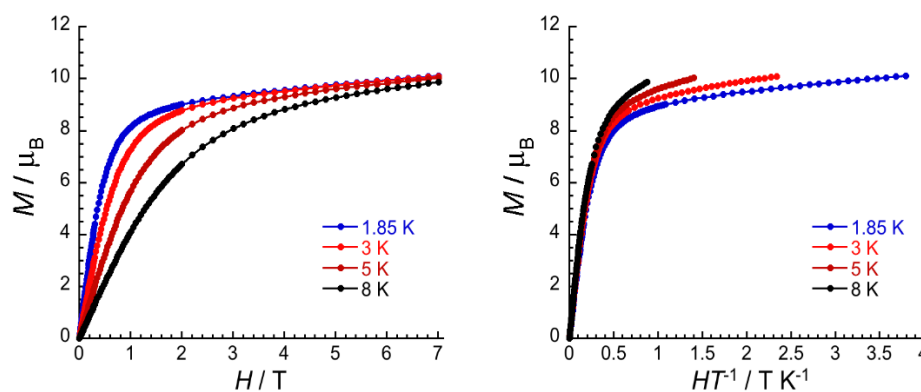

**Figure S7.** (Left) Field dependence of magnetization for 2:2MeOH:1.5H<sub>2</sub>O at the temperatures indicated, scanning at 100 – 400 Oe·min<sup>-1</sup> for  $H < 1$  T and 500 – 2500 Oe·min<sup>-1</sup> for  $H > 1$  T. (Right) Field dependence of reduced magnetization at the temperatures indicated. Solid lines are guides for the eye.

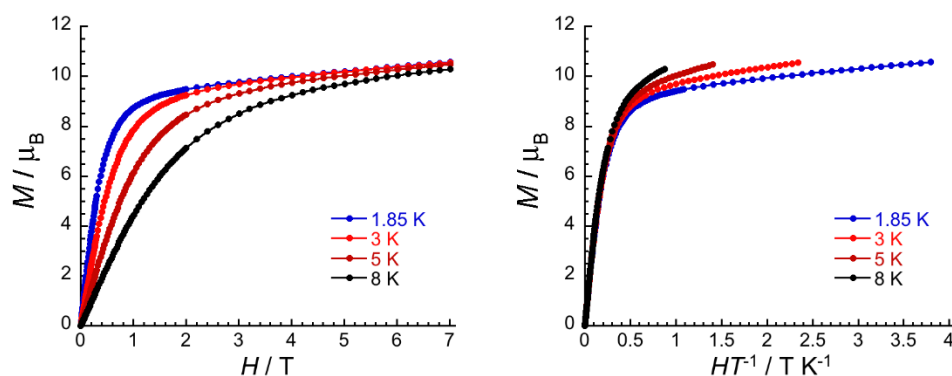

**Figure S8.** (Left) Field dependence of magnetization for 3:2.5MeOH at the temperatures indicated, scanning at 100 – 400 Oe·min<sup>-1</sup> for  $H < 1$  T and 500 – 2500 Oe·min<sup>-1</sup> for  $H > 1$  T. (Right) Field dependence of reduced magnetization at the temperatures indicated. Solid lines are guides for the eye.

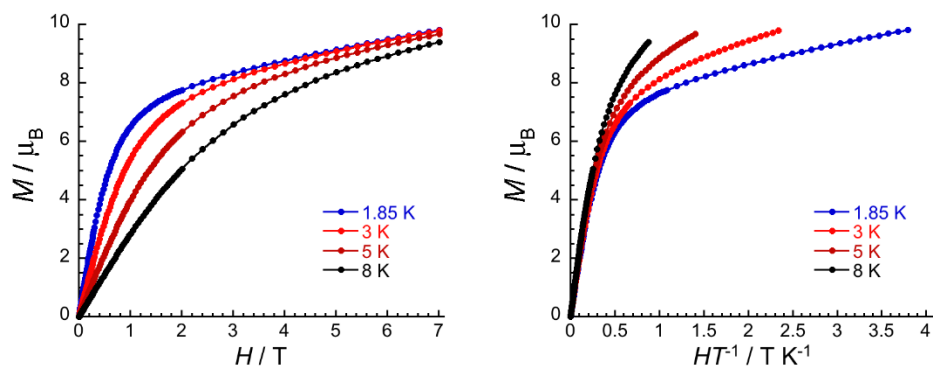

**Figure S9.** (Left) Field dependence of magnetization for 4·3MeOH·0.5H<sub>2</sub>O at the temperatures indicated, scanning at 100–400 Oe·min<sup>-1</sup> for  $H < 1$  T and 500 – 2500 Oe·min<sup>-1</sup> for  $H > 1$  T. (Right) Field dependence of reduced magnetization at the temperatures indicated. Solid lines are guides for the eye.

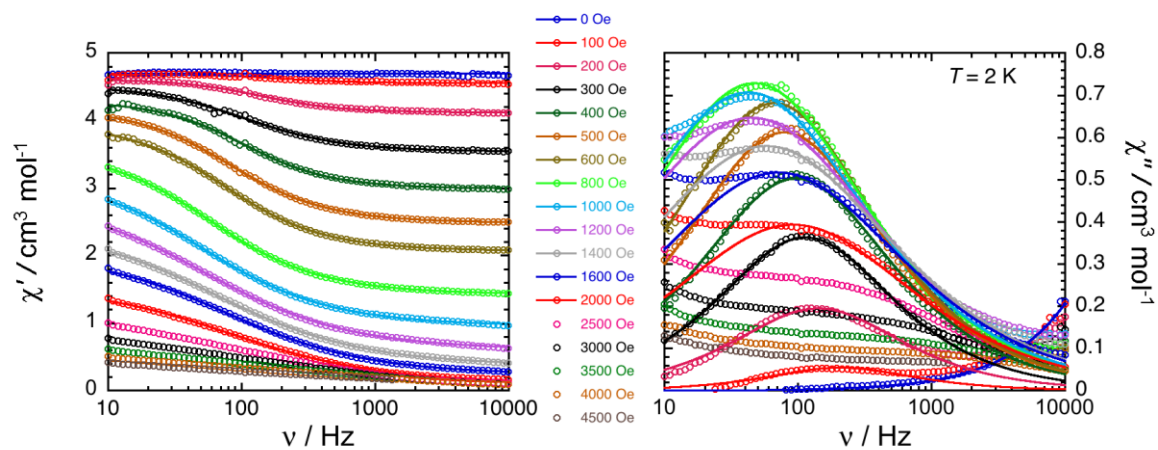

**Figure S10.** Frequency dependence of the real ( $\chi'$ , left) and imaginary ( $\chi''$ , right) parts of the ac susceptibility for 3·2.5MeOH collected at 2 K and varying dc fields. Solid lines are the best fits obtained with the Debye generalized model.

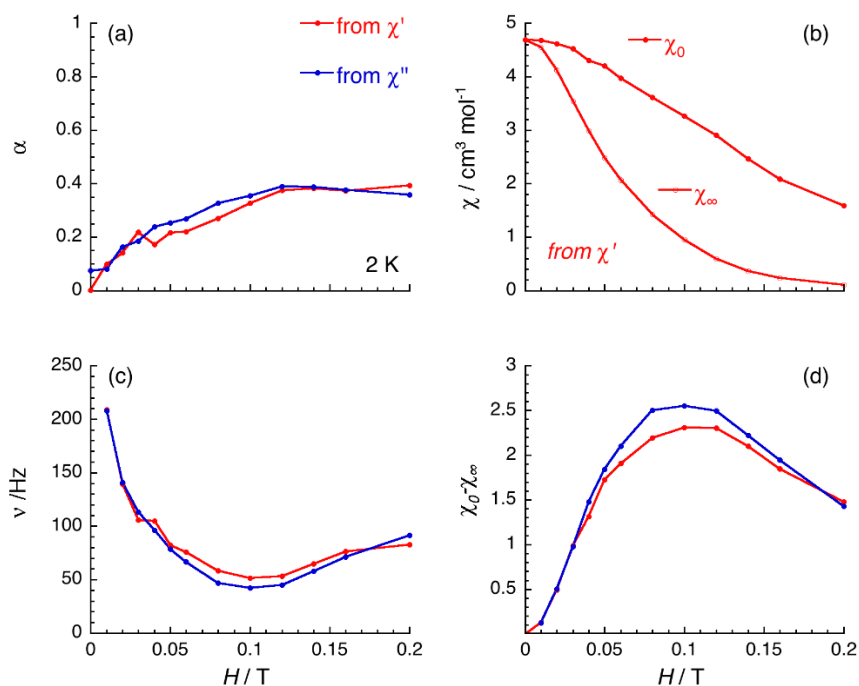

**Figure S11.** Field dependence of the parameters  $\alpha$  (a),  $\chi_0$  and  $\chi_\infty$  (b),  $\nu$  (c) and  $\chi_0\chi_\infty$  (d) between 0 and 0.2 T deduced from the generalized Debye fit of the frequency dependence of the real ( $\chi'$ ) and imaginary ( $\chi''$ ) components of the ac susceptibility at 2 K, shown in Figure S10, for 3-2.5MeOH. Solid lines are visual guides.

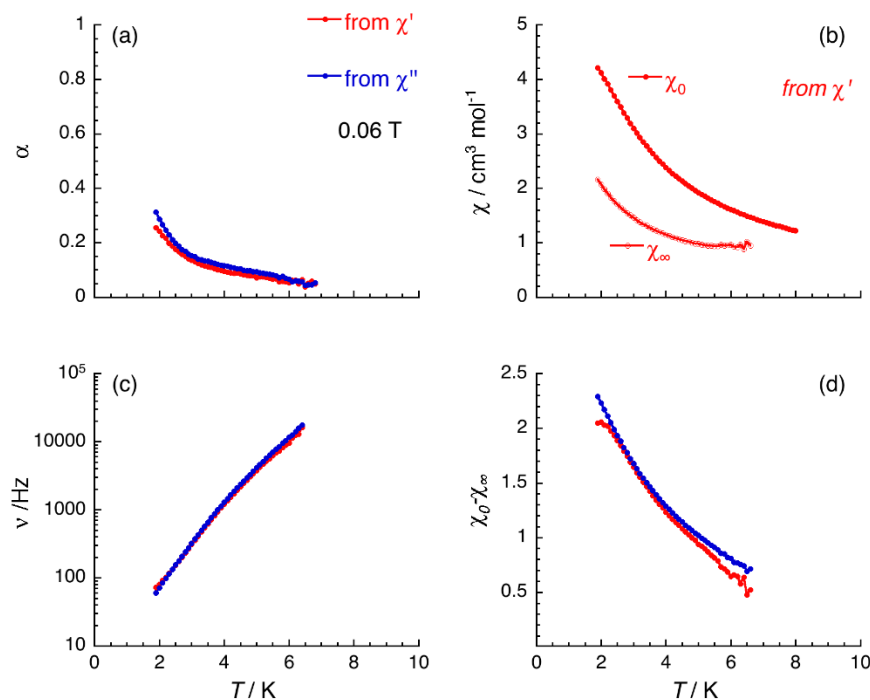

**Figure S12.** Temperature dependence of the parameters  $\alpha$  (a),  $\chi_0$  and  $\chi_\infty$  (b),  $\nu$  (c) and  $\chi_0\chi_\infty$  (d) between 1.8 and 8 K deduced from the generalized Debye fit of the frequency dependence of the real ( $\chi'$ ) and imaginary ( $\chi''$ ) components of the ac susceptibility at 0.06 T, shown in Figure 8 of the main text, for 3-2.5MeOH. Solid lines are visual guides.



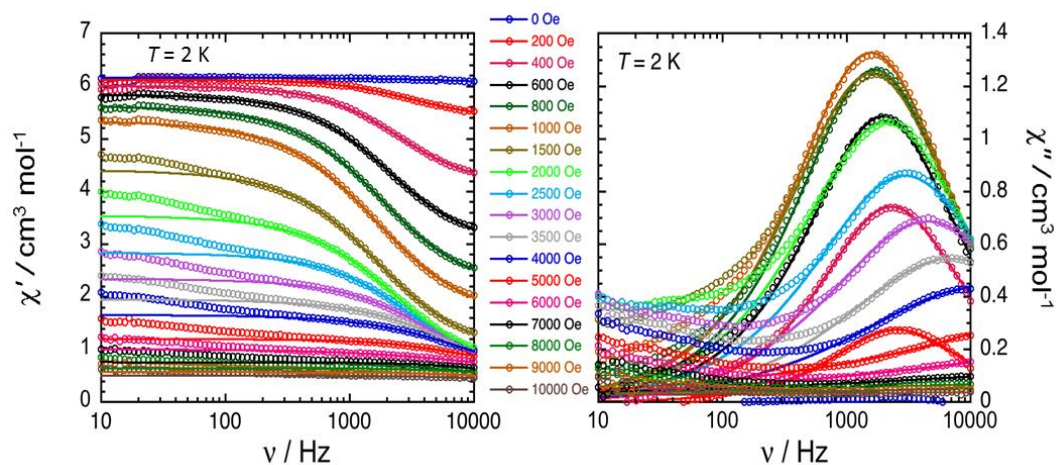

**Figure S13.** Frequency dependence of the real ( $\chi'$ , left) and imaginary ( $\chi''$ , right) parts of the ac susceptibility for 4·3MeOH·0.5H<sub>2</sub>O collected at 2 K and varying dc fields. Solid lines are the best fits obtained with the Debye generalized model.

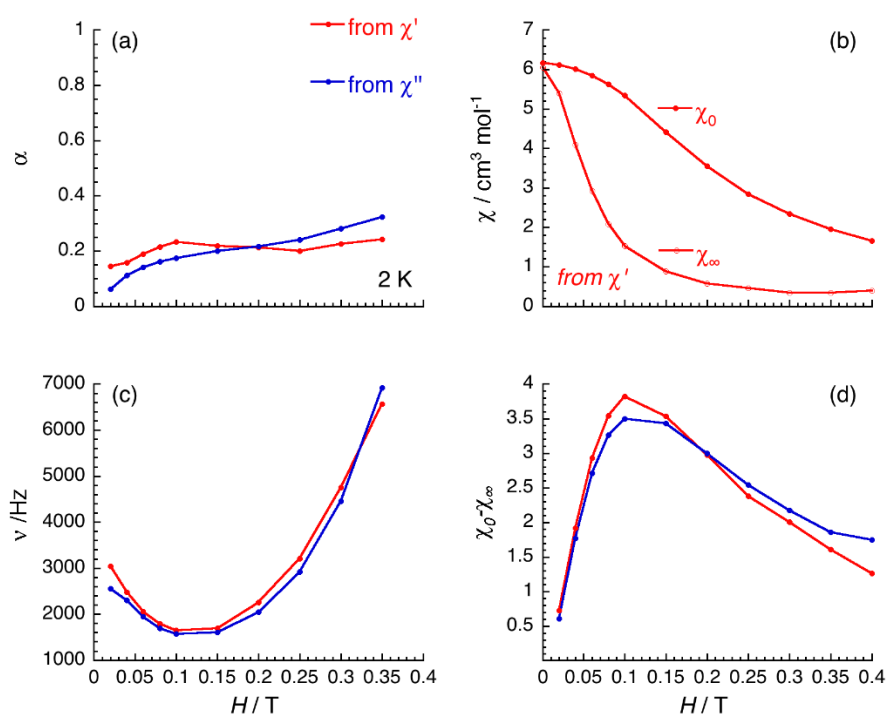

**Figure S14.** Field dependence of the parameters  $\alpha$  (a),  $\chi_0$  and  $\chi_\infty$  (b),  $\nu$  (c) and  $\chi_0\chi_\infty$  (d) between 0 and 0.4 T deduced from the generalized Debye fit of the frequency dependence of the real ( $\chi'$ ) and imaginary ( $\chi''$ ) components of the ac susceptibility at 2 K, shown in Figure S13, for 4·3MeOH·0.5H<sub>2</sub>O. Solid lines are visual guides.

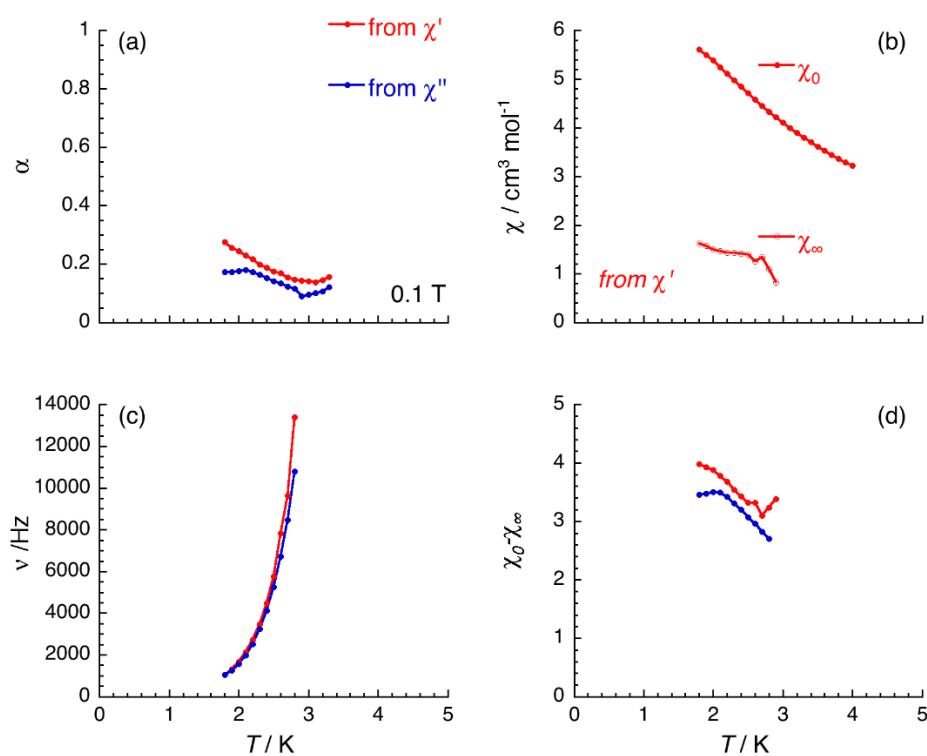

**Figure S15.** Temperature dependence of the parameters  $\alpha$  (a),  $\chi_0$  and  $\chi_\infty$  (b),  $\nu$  (c) and  $\chi_0 \chi_\infty$  (d) between 1.8 and 3 K deduced from the generalized Debye fit of the frequency dependence of the real ( $\chi'$ ) and imaginary ( $\chi''$ ) components of the ac susceptibility at 0.1 T, shown in Figure 9 of the main text, for 4:3MeOH:0.5H<sub>2</sub>O. Solid lines are visual guides.



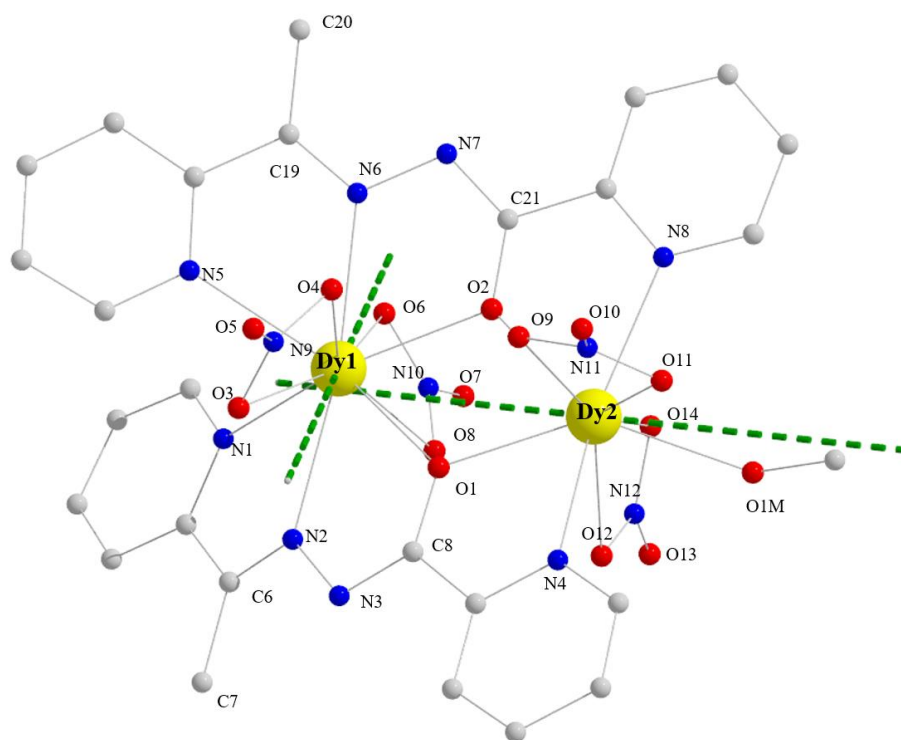

**Figure S16.** Position of the ground-state magnetic anisotropy axes (dashed green bars) for the two Dy<sup>III</sup> atoms in the molecule of 3·2.5MeOH.

**Table S1.** Continuous Shape Measures (CShM) values for the potential coordination polyhedra of Dy1 in the structure of complex 3·2.5MeOH.

| Ideal Coordination Polyhedron                 | CShM value <sup>a</sup> |
|-----------------------------------------------|-------------------------|
| Decagon (DP-10)                               | 34.649                  |
| Enneagonal pyramid (EPY-10)                   | 23.939                  |
| Octagonal bipyramid (OBPY-10)                 | 16.083                  |
| Pentagonal prism (PPR-10)                     | 10.318                  |
| Pentagonal antiprism (PARP-10)                | 10.299                  |
| Bicapped cube (BCCU-10)                       | 9.688                   |
| Bicapped square antiprism (BCSAPR-10)         | 4.357                   |
| Metabidiminished icosahedron (MBIC-10)        | 6.864                   |
| Augmented tridiminished icosahedron (ATDI-10) | 19.747                  |
| Sphenocorona (SPC-10)                         | <b>2.573</b>            |
| Staggered dodecahedron (2:6:2)                | 4.106                   |

<sup>a</sup> The polyhedron with the smallest CShM value (in bold) is the real coordination polyhedron of the Dy1 center for the complex.

**Table S2.** Continuous Shape Measures (CShM) values for the potential coordination polyhedra of Dy<sup>2+</sup> in the structure of complex **3**·2.5MeOH.<sup>a</sup>

| Ideal Coordination Polyhedron                | CShM value <sup>a</sup> |
|----------------------------------------------|-------------------------|
| Enneagon (EP-9)                              | 36.250                  |
| Octagonal pyramid (OPY-9)                    | 22.890                  |
| Heptagonal bipyramid (HBPY-9)                | 17.853                  |
| Triangular cupola (TC-9)                     | 15.242                  |
| Capped cube (JCCU-9)                         | 10.871                  |
| Spherical-relaxed capped cube (CCU-9)        | 9.032                   |
| Capped square antiprism (JCSAPR-9)           | 2.995                   |
| Spherical capped square antiprism (CSAPR-9)  | <b>1.759</b>            |
| Tricapped trigonal prism (JTCTPR-9)          | 4.508                   |
| Spherical tricapped trigonal prism (TCTPR-9) | 2.832                   |

<sup>a</sup> The polyhedron with the smallest CShM value (in bold) is the real coordination polyhedron of the Dy<sup>2+</sup> center for the complex.

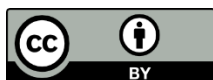

© 2020 by the authors. Licensee MDPI, Basel, Switzerland. This article is an open access article distributed under the terms and conditions of the Creative Commons Attribution (CC BY) license (<http://creativecommons.org/licenses/by/4.0/>).
